# Supplementary material for: Episodic future thinking reduces delay discounting and cigarette demand: an investigation of the good-subject effect
Source: Springer Nature journal article supplement (doi:10.1007/s10865-017-9908-1), 2017-12-21
Supplement: MOESM1 [file 15327402]

**Supplemental Material: Participants’ statements of study purpose and associated ratings of study purpose expectancy from independent observers.**

Exemplar:I think the purpose of this study is to see... "if [***thinking about the future/past*]** will **[*change behavior*].**". Bracketed elements may be described specifically or generally. For example, "thinking" may include thinking, emotions, feelings, etc. "Future" or "past" may include any reference to the events we asked participants to generate. "Behavior" may include overt behavior (e.g., choices, smoking) or covert behavior (e.g., thoughts or attitudes). "Change" may include any reference to a functional relationship between variables. Note also that elements may be written in the passive voice (e.g., [***if behavior will be changed***] by [***thinking about the future/past***]").

Instructions: Rate a statement as "2" if it contains **both** bracketed elements in the template, even if those elements co-occur with other, irrelevant information. Rate a statement as "1" f a statement has only **one** bracketed element. Rate a statement as "0" if it does not have **either** bracketed element.

| **Subject ID** | **Rater 1** | **Rater 2a** | **Statement** |
| --- | --- | --- | --- |
| 3633039018346 | 2 | 2 | I think the purpose of this study is to see... how memories and desirable experiences effect your feelings related to smoking. I think it looked at the correlation between what people would give to smoke a cigarette (in this case, monetarily) when still vividly considering positive events that have recently occurred. |
| 3337999114559 | 2 | 2 | I think the purpose of this study is to see...if I was thinking about smoking while describing these events and how important smoking was to me when thinking of these events |
| 5223838587601 | 0 | 0 | I think the purpose of this study is to see what our emotions have to do with our desire to smoke cigarettes. |
| 4638556540012 | 2 | 2 | I think the purpose of this study is to see...whether or not life events will affect you and will let think twice before you start smoking again. Life is precious and how far would I go to smoke. |
| 4105816475219 | 2 | 2 | I think the purpose of this study is to see...how future events that are positive relate to smoking habits. |
| 7541085345049 | 2 | 2 | I think the purpose of this study is to see how much someone would pay for a cigarette in a really happy situation. |
| 1473853393561 | 2 | 2 | I think the purpose of this study is to see how thinking about historical events that were enjoyable affected your desire for a cigarette and current mood. |
| 4782192582885 | 1 | 2 | I think the purpose of this study is to see... what distracts us from smoking |
| 4410234933925 | 0 | 1 | I think the purpose of this study is to see how irritated I would get having to think about the past. |
| 3904519263240 | 2 | 2 | I think the purpose of this study is to see if positive future events had an affect on desires to smoke. |
| 4511528060667 | 1 | 1 | I think the purpose of this study is to see how people can recall detailed events |
| 1239762430389 | 2 | 2 | I think the purpose of this study is to see how thinking about positive events in our lives influence our use of cigarettes. I know when I am having a positive time or doing something productive my urge lowers. When I am depressed or feeling alone my urge to use definitely rises. |
| 3298930343654 | 0 | 1 | I think the purpose of this study is to see...what decisions I will make based on my need for cigarettes. I think you are trying to see if I can make sound decisions |
| 1725267780323 | 1 | 1 | I think the purpose of this study is to see if I am ready to quit smoking. |
| 8223127776549 | 0 | 1 | I think the purpose of this study is to see...smoking motivation |
| 2637913003563 | 0 | 0 | I think the purpose of this study is to see... If I could think beyond my habits. |
| 7506801784038 | 0 | 0 | I don't know. |
| 7134594867626 | 2 | 2 | I think the purpose of this study is to see how memories effect smoking desire |
| 8136103488504 | 0 | 0 | I think the purpose of this study is to see how happy smokers are |
| 1716063635216 | 0 | 1 | I think the purpose of this study is to see how much i want to quit smoking so as to come up with a marketing stratagy for a product |
| 6253814751075 | 2 | 2 | I think the purpose of this study is to see...how much recalling happy events triggers a need for a cigarette in smokers and how much we would pay to smoke them. |
| 5389537716077 | 1 | 2 | I think the purpose of this study is to see...how long term thinking affects goals. |
| 8003318682312 | 1 | 1 | I think the purpose of this study is to see how people make decisions especially in relation to smoking cigarettes |
| 6777708344161 | 0 | 1 | I think the purpose of this study is to see...if people only smoke when stressed or if it is just a crutch for them. Not true. Some people just enjoy it. And after smoking for 30 years, it's taking a lot to get me to quit. It was very difficult thinking of so many pleasant events, though. Some people's lives just suck all the way around and the only good part is having food to eat. Oh, and I did smoke while taking this survey. I have to quit next week because of health issues, and I'm going to enjoy every second of smoking I can. I like it. I enjoy it as much as a hug from my son. And will miss it when I no longer smoke. |
| 4948766649597 | 2 | 2 | I think the purpose of this study is to see how people's decision-making tendencies are affected by the contemplation of different scopes of time, and by contemplating desirable outcomes. |
| 1864636809461 | 1 | 1 | I think the purpose of this study is to see how different situations and factors can determine how much I smoke and have the urge. |
| 9913184957371 | 2 | 2 | I think the purpose of this study is to see how much smokers want to smoke when tasked with writing and thinking about the future. Having to answer question after question about the future and then how much I wanted to smoke, made me realize that this is a problem with who I am and will be more interested in quitting smoking before those important events. |
| 1875052617655 | 2 | 2 | I think the purpose of this study is to see... if vivid thoughts change cravings for cigarettes. |
| 5032298324836 | 1 | 1 | I think the purpose of this study is to see... Examine instant gratification among smokers. |
| 4951281522711 | 0 | 1 | I think the purpose of this study is to see...the cravings related to certain events in someone's life. |
| 5416079064210 | 0 | 0 | I think the purpose of this study is to see...how people behave when they are smokers. |
| 4929222224487 | 0 | 0 | I think the purpose of this study is to see... how much people will pay for cigarettes in relation to their emotions. |
| 1552079216473 | 1 | 1 | I think the purpose of this study is to see how smokers correlate events in their life and how much they would be willing to pay for cigarettes until they decide its not worth it. |
| 6444544982578 | 2 | 2 | I think the purpose of this study is to see...whether or not someone can imagine the future of good instead of smoking. |
| 5014830881522 | 2 | 2 | I think the purpose of this study is to see... how reflection and expectation might affect the desire to smoke a cigarette. To see if there is a decline for desire to smoke in regards to the specific events. |
| 6374080094198 | 2 | 2 | I think the purpose of this study is to see...if thinking about positive events will make me want to smoke less. |
| 4175981589489 | 2 | 2 | I think the purpose of this study is to see...how strong my urges to smoke are when in different situations. |
| 5856030227409 | 0 | 1 | I think the purpose of this study is to see... If I really want to smoke |
| 4970973096787 | 0 | 1 | I think the purpose of this study is to see...how strong my cravings or desires are for smoking? |
| 4039137570394 | 1 | 1 | I think the purpose of this study is to see what sort of choices are affected when money becomes a driving issue. |
| 3371242922213 | 1 | 2 | I think the purpose of this study is to see... how feeling happy helps you not want to smoke. |
| 2283118818369 | 0 | 0 | I think the purpose of this study is to see...to show the cost that occur with being a smoker, taking away from money you can use for other things. |
| 9919048791958 | 2 | 2 | I think the purpose of this study is to see how people's cravings for cigarettes are affected by positive memories, and if there is an association between number of cigarette cravings compared to positive thoughts. |
| 2112652216520 | 2 | 2 | I think the purpose of this study is to see... if in thinking about positive events in our future very vividly would make us want or not want to smoke. |
| 9578969478607 | 0 | 0 | I think the purpose of this study is to see... how a person thinks and if they smoke. |
| 5575901423063 | 1 | 1 | I think the purpose of this study is to see how being distressed or excited affects my cigarette choices |
| 5077005707555 | 2 | 2 | I think the purpose of this study is to see...how our positive experiences influence our craving for cigarettes |
| 5951136594845 | 2 | 1 | I think the purpose of this study is to see... individual's perception of the future, and also the smoker's thinking and attitude towards smoking. |
| 9926188571585 | 2 | 2 | I think the purpose of this study is to see...if positive future thinking can keep a person from thinking about smoking. / |
| 3749214129315 | 0 | 0 | I think the purpose of this study is to see... Decision making and Episodic Thinking |
| 6226286929514 | 2 | 2 | I think the purpose of this study is to see whether or not reliving positive experiences has an effect on one's ability to delay gratification. |
| 5404975364605 | 2 | 2 | I think the purpose of this study is to see if thinking of future positive events affects how much a person may want to smoke. |
| 8290525016685 | 2 | 2 | I think the purpose of this study is to see if people are addicted to smoking. How much would you pay for a cigarette when you are enjoying good times? How badly do you need a cigarette when you want one? Are you smoking cigarettes within your financial means, or is this "addiction" something that is making you go over your head. I feel that the answers to this questions is the purpose of the study. |
| 1290146323541 | 2 | 2 | I think the purpose of this study is to see...if imagining positive moments impacts my desire to smoke. And if the cost of cigarettes would impact smoking more or less. |
| 3207878147562 | 0 | 1 | I feel that this is a study of how an extreme "cigarette" tax would possibly deter smokers. |
| 6082061433957 | 2 | 2 | I think the purpose of this study is to see...how I can keep busy with other things and not think about smoking. |
| 6084132815400 | 2 | 2 | I think the purpose of this study is to see... if I could get through my smoking addiction by focusing on positive thoughts of the future. |
| 4697960072921 | 2 | 2 | I think the purpose of this study is to see...how much a person values future events in relation to their smoking habits. |
| 5428621081842 | 0 | 0 | I think the purpose of this study is to see how expensive you pearl-clutchers have to make cigarettes in order to force people to stop smoking. |
| 7863225514690 | 2 | 2 | I think the purpose of this study is to see...how focusing on positive future events would help curb cravings for cigarets. |
| 2354159615933 | 2 | 2 | I think the purpose of this study is to see...how likely people are to continue smoking if they can visualize important events in the future. |
| 9977200449340 | 2 | 2 | I think the purpose of this study is to see...how one reacts to the desire of smoking when confronted with vivid events/memories over different time periods. |
| 6175710517499 | 0 | 0 | I think the purpose of this study is to see how I generally feel about life and correlate it to my personality. |
| 2016977878908 | 0 | 0 | I think the purpose of this study is to see ones reaction in various situations. |
| 2846287662784 | 0 | 1 | I think the purpose of this study is to see how much people will pay for cigarettes in certain situations. |
| 5326851904392 | 1 | 2 | I think the purpose of this study is to see...if putting your state of mind into a relaxing and non-confronting or nervous experience would relax the intensity of needing a cigarette. |
| 1835851363009 | 1 | 1 | I think the purpose of this study is to see... The decisions people make when presented with random situations. |
| 9835895676579 | 2 | 2 | I think the purpose of this study is to see... how thoughts of pleasant future events relates to smoking desire. |
| 5682441579798 | 2 | 2 | I think the purpose of this study is to see... if happy events or thoughts can replace the urge to smoke or how prices really affect the guilt in smoking. |
| 5116241412858 | 1 | 1 | I think the purpose of this study is to see how people think about future events |
| 3472578989134 | 0 | 0 | I think the purpose of this study is to see what the common people would pay for tobacco use. |
| 5496858788861 | 1 | 2 | I think the purpose of this study is to connect emotions with smoking. I thought it was interesting with each increase in the cost of the cigarettes, the more difficult it was to focus on the events that I was in. I began to prioritize cigarettes vs the importance of my family |
| 2191407692929 | 2 | 2 | I think the purpose of this study is to see how factors such as money, and positive imaging affect ones desire to smoke. |
| 6960164432724 | 0 | 0 | I think the purpose of this study is to see...how cigarettes affect big events in our lives |
| 9978763345215 | 0 | 1 | I think the purpose of this study is to see what a smoker would do in real if the cigarette prices go up drastically. How would his/her psychology work. |
| 4532578591671 | 0 | 0 | I think the purpose of this study is to see how much smoking affects everyday life. |
| 4166175044245 | 2 | 2 | I think the purpose of this study is to see... how people crave cigarette is enjoyable times. |
| 6125129382643 | 2 | 2 | I think the purpose of this study is to see how I make choices while recalling a happy memory. |
| 4870163852141 | 0 | 0 | I think the purpose of this study is to see... / Smokers views or maybe it was about sentence structure. |
| 4426038170026 | 2 | 2 | I think the purpose of this study is to see how pleasurable responses could make me want to smoke a cigarette. |
| 8001663076380 | 2 | 2 | I think the purpose of this study is to see... how imagining positive, pleasant scenarios impacts a person's desire to smoke. Perhaps another group was asked to imagine negative, unpleasant scenarios... and then a comparison made between the groups to see who felt a stronger desire to smoke. Or, maybe you just wanted to test to see how long we (study participants) can go without a cigarette. Perhaps the length of this answer is part of your hypothesis - as thoughts have having a cigarette increase, how detailed are participants in providing answers to open-ended questions? / / So, bottom line... I'm not sure! :-) |
| 6680275719198 | 1 | 1 | I think the purpose of this study is to see...emotions affect smoking patterns. |
| 7414441895153 | 0 | 1 | I think the purpose of this study is to see how much smokers would pay for cigarettes and how much smoking is the center of their lives. |
| 9569018834994 | 2 | 2 | I think the purpose of this study is to see how the memory of past positive experiences can effect the decision to delay rewards and alter perceived value. |
| 9198596303661 | 2 | 2 | I think the purpose of this study is to see if I am able to envision my future. I assume since this study asked about cigarettes, it tried to make me realize that smoking is expensive and challenges my health. It could potentially stop me from getting to the places I envisioned myself in 3 months, 1 year, and 3 years. |
| 2951826544271 | 0 | 0 | I think the purpose of this study is to see how much control I as an individual choose to smoke and the various triggers. I do not intend to be smoking once I get a job and hopefully before Sedona. By Jamaica I do not want to be smoking or be having the urge to smoke. Price does matter but I think it will be better once I have achieved a way to make my living on my terms. |
| 6959482050604 | 2 | 2 | I think the purpose of this study is to see the effect of positive events on the habits of smoking. Additionally, you want to see if there is a connection between these events and the price willing to be paid for the perceived joy of smoking. |
| 1950528741710 | 2 | 2 | I think the purpose of this study is to see how different events in my life affect my smoking habits. I think they are trying to tie those habits to things I look forward to in an effort to see how important of a role cigarettes play. I also think they are trying to see how important a cigarette is to my experience and how much i would be willing to pay to have my cigarettes during these specific time. Lastly, I think researchers are looking to see if the person responding has intentions of quitting in the future - if the person responding is thinking they will be smoking three years out they either have to plans for quitting, or they aren't confident in their self control. |
| 5704771363072 | 0 | 0 | I think the purpose of this study is to see how dependent various people are on cigarettes. |
| 2332445420324 | 1 | 0 | I think the purpose of this study is to see...if people can vividly think about things from the past. |
| 6332990456786 | 2 | 2 | I think the purpose of this study is to see... How urges to smoke are triggered by up coming events and the excitement/stress levels associated with thinking about them. |
| 8561267683075 | 0 | 1 | I think the purpose of this study is to see what triggers cravings for cigarettes. |
| 5525277285940 | 1 | 1 | I think the purpose of this study is to see...what sort of choices that cigarette smokers make, and how much value cigarette smokers put on their cigs |
| 4578947482837 | 1 | 1 | I think the purpose of this study is to see...how participants recall events in a specific time period. |
| 4238538270195 | 0 | 1 | I think the purpose of this study is to see...how badly a smoker will crave a cigarette during times when they may not have access to one. What they would do for a cigarette |
| 2700577651460 | 0 | 0 | I think the purpose of this study is to see how people perceive their own ability to quit smoking depending on time and price |
| 6985355706678 | 1 | 1 | I think the purpose of this study is to see...about people's habits. I think they wanted to see what events coinsided with people wanting to smoke... |
| 2668388692868 | 2 | 2 | I think the purpose of this study is to see... if a person things about health effects of continuing to smoke with future events. |
| 1225273398061 | 0 | 0 | I think the purpose of this study is to see...I have no idea |
| 2150534747375 | 0 | 0 | I think the purpose of this study is to see how nicotine addiction has an effect on recalling past good moments of our lives, and how much we are willing to spend on cigarettes before quitting if they become too expensive. |
| 7066251697639 | 0 | 0 | I think the purpose of this study is to see...if people will include cigarettes in their written thoughts in regards to positive moments they imagine. |
| 1535751670598 | 2 | 2 | I think the purpose of this study is to see how thinking about future goals effects desires for cigarettes |
| 2006378790570 | 0 | 0 | I think the purpose of this study is to see if smokers have an issue with delayed gratification. |
| 6458277027640 | 2 | 2 | I think the purpose of this study is to see how vivid positive moments in our lives affect our feelings regarding addictions and other non relevant habits. |
| 7647631482945 | 2 | 2 | I think the purpose of this study is to see how thoughts, good or bad, affect addiction. |
| 2550454574326 | 2 | 2 | I think the purpose of this study is to see how thinking about the future affects our desire to smoke. Or maybe, it is testing how much you still want to smoke when your mind is on other events and busy. |
| 4916841718885 | 2 | 2 | I think the purpose of this study is to see...how thinking of the future makes people think about smoking and stopping. |
| 6190110937588 | 1 | 1 | I think the purpose of this study is to see if moments of true happiness have effects on our urge to smoke. |
| 1841756457255 | 2 | 2 | I think the purpose of this study is to see impact on certain events have on smoking habits. |
| 9977712651921 | 0 | 1 | I think the purpose of this study is to see if I am capable of quitting smoking. |
| 7186993302570 | 1 | 1 | I think the purpose of this study is to see how lifestyle choices might impact the daily decisions you make in your lifetime. |
| 8418461233377 | 2 | 2 | I think the purpose of this study is to see...if thinking about enjoyable events in the future diminish the urge to smoke? I really don't know or speculate much on the purpose , and that is out of my field of expertise, but I do find it interesting and sometimes rewarding to partake in these in depth studies and experiments. |
| 3056798767712 | 2 | 2 | I think the purpose of this study is to see...whether participants visualizing something they're anticipating helps with being willing to delay gratification? Argh.... I don't know... :) |
| 1243578481177 | 2 | 2 | I think the purpose of this study is to see how smokers' urge to smoke correlates with positive events and emotions. |
| 9603946204814 | 0 | 1 | I think the purpose of this study is to see how smokers react to certain stimuli vs non-smokers. |
| 1728759966790 | 2 | 2 | I think the purpose of this study is to see how memories effect my desire to smoke. |
| 4779325591193 | 1 | 2 | I think the purpose of this study is to see how emotions effect the price point of purchasing cigarettes |
| aAlthough both raters appear in this spreadsheet, ratings were obtained independently | | | |
